# Supplementary material for: Malaria Molecular Surveillance in the Peruvian Amazon with a Novel Highly Multiplexed Plasmodium falciparum AmpliSeq Assay
Source: PubMed Central journal article supplement (PMC10101074; doi:10.1128/spectrum.00960-22), 2023-02-22
Supplement: spectrum.00960-22-s0002.pdf [file spectrum.00960-22-s0002.pdf]

## Supplementary file

This material accompanies the article “Novel highly multiplexed targeted NGS assay for molecular surveillance of *P. falciparum* reveals selection on drug and diagnostic resistance associated genes in the Peruvian Amazon from 2003 to 2018.” by J.H. Kattenberg et al.. The paper presents the design and validation of a *P. falciparum* AmpliSeq assay for the purpose of molecular surveillance of *P. falciparum* in Peru. This supplementary file contains supplementary figures and tables supporting the data presented in the paper in more detail. In addition, included in the Pf AmpliSeq assay is a SNP barcode which was designed to monitor parasite strains circulating in Peru over space and time. This document presents the details of how the SNPs were selected for this barcode and includes additional details for the bioinformatic methods used during the validation

### **List of supplementary material:**

#### **Supplementary data (.xlsx):**

Variants of interest for drug resistance

Pf AmpliSeq design: primer sequences and locations on the genome

Pairwise linkage disequilibrium (r<sub>barD</sub>) and allele loadings for within-country SNP selection for *P. falciparum* Ampliseq Peru

#### **Supplementary file:**

##### **Supplementary figures and tables**

**Figure S1.** Distribution of depth of coverage of aligned high quality reads past filter (format field DP) per amplicon region.

**Table S1.** Amplicons with low genotype depth.

**Table S2.** Amplicons with high genotype depth of coverage (>150).

**Table S3.** Amplicons in conserved regions.

**Figure S2.** Effect of selective whole genome amplification (sWGA)

**Table S4.** Error rates in 3D7 replicates without and with sWGA in different subsets of loci.

**Table S5.** Genotyping known variants in previously genotyped controls

**Table S6.** Detection limit of variant loci in 3D7-Dd2 mock samples

**Table S7.** Complexity of infection analyses.

**Figure S3.** Proportion multiple clone infections in Peru.

**Table S8.** Pairwise comparison of *hrp2/hrp3* classification by PCR and Pf AmpliSeq

**Table S9** Barcode SNPs.

**Figure S4.** Principal component analysis of samples (n=254) collected in Peru between 2003 and 2018.

**Figure S5. Expected Heterozygosity by time period and district.**

**Table S10. p-values for pairwise comparisons of *He*.**

**Figure S6. Genetic differentiation between parasite populations in the three time periods**

**Figure S7. Minimum spanning network (nLV graph) of multilocus lineages**

**Table S11. Linkage disequilibrium**

**Table S12. 28-SNP barcode loci that become fixed over time**

**Table S13 Contributions of alleles to DAPC.**

**Figure S8. Copy number variations in A) *plasmepsin II gene (pm2)* and B) *multidrug resistance gene 1 (mdr1)***

**Table S14 Cost comparison AmpliSeq vs WGS**

**Table S15: Laboratory strains included in assay validation**

**Figure S9. Distributions of log mean depth ratio's for all samples for each *hrp3* amplicon and *hrp2* amplicon**

**Table S16. Cutoff thresholds for *hrp2* and *hrp3* determination of deletions for each amplicon.**

## **Supplementary methods**

**1. SNP Barcode selection**

**2. Bioinformatic analysis for validation**

**References supplementary methods**

## Supplementary tables and figures

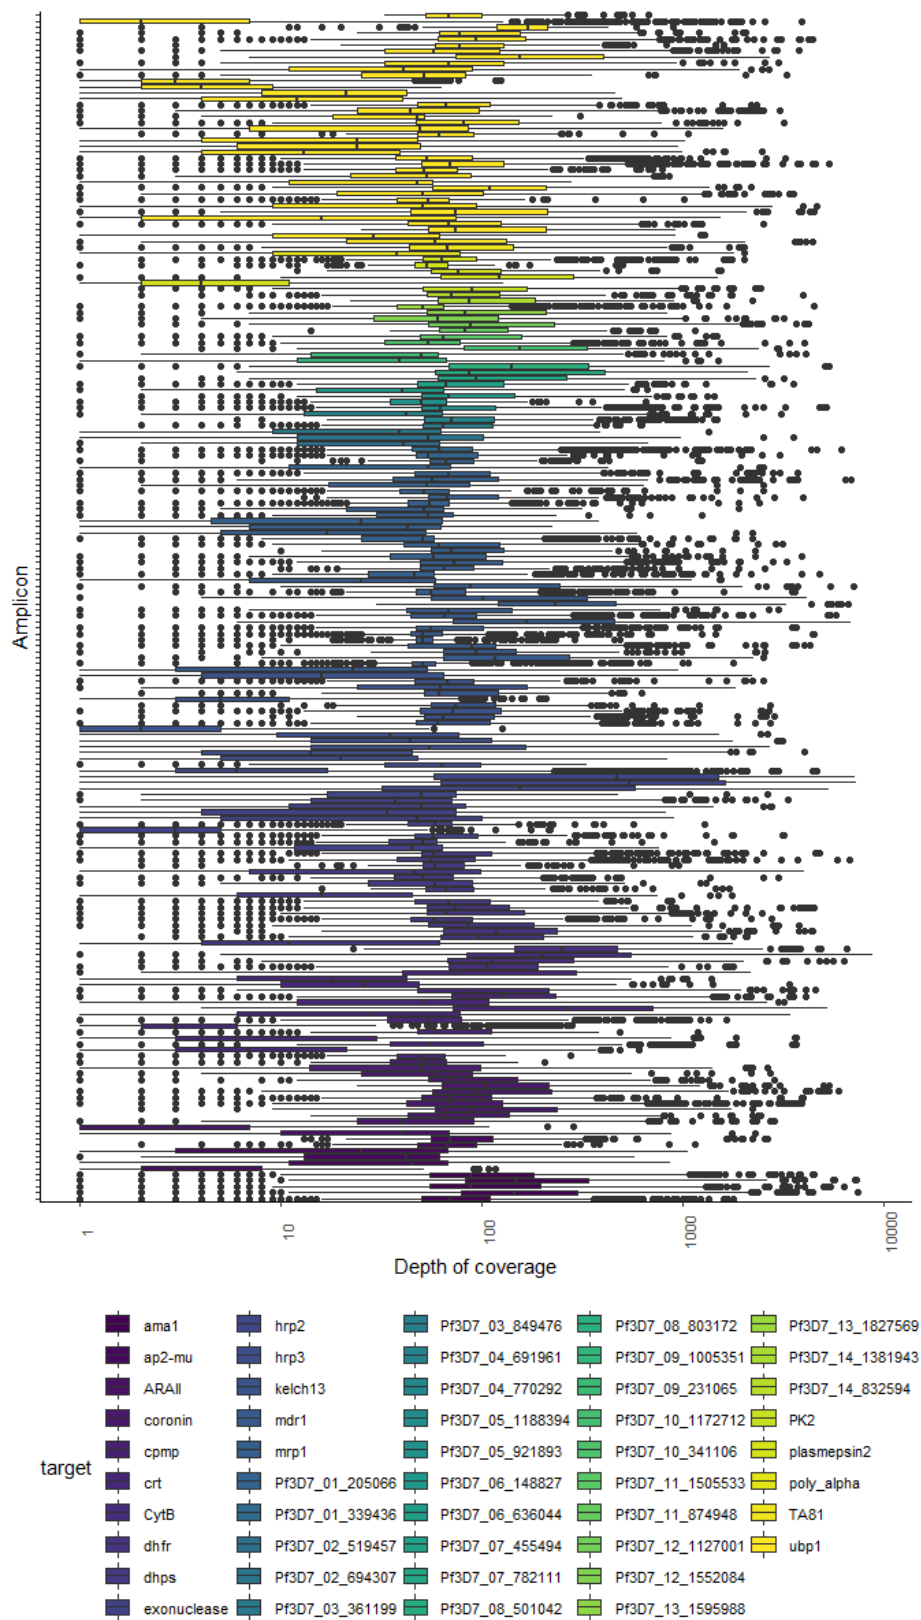

Figure S1. Distribution of depth of coverage of aligned high quality reads past filter (format field DP) per amplicon region.

**Table S1. Amplicons with low genotype depth.** The proportion of samples or controls with depth of coverage below 10 are listed. When both the controls and the samples have a high proportion of libraries with low depth, then the amplicon is not working well. When there is a higher proportion of samples than controls with low depth, then it is more likely due to variability in the sequence in the study samples. The *hrp2* and *hrp3* amplicons have lower mean depth in the samples than in the controls due to high prevalence of gene deletions in the samples from Peru. There is one *ubp1* amplicon (*ubp1\_29*) that also has poorer performance in samples than controls, possibly due to variations in primer regions in the study samples.

| Amplicon_ID | CHR         | START   | END     | POOL | Target       | Amplicon name | % Samples with mean depth <10 | % controls with mean depth <10 |
|-------------|-------------|---------|---------|------|--------------|---------------|-------------------------------|--------------------------------|
| AMPL3594045 | Pf3D7_12_v3 | 2091952 | 2092317 | 1    | coronin      | coronin_1     | 93%                           | 100%                           |
| AMPL3593126 | Pf3D7_13_v3 | 1724575 | 1724896 | 1    | K13          | K13_1         | 94%                           | 99%                            |
| AMPL3594029 | Pf3D7_13_v3 | 2503988 | 2504341 | 2    | exonuclease  | exonuclease_4 | 94%                           | 99%                            |
| AMPL3594038 | Pf3D7_12_v3 | 717766  | 718035  | 1    | ap2-mu       | ap2-mu_1      | 91%                           | 93%                            |
| AMPL3594106 | Pf3D7_01_v3 | 200597  | 200953  | 1    | ubp1         | ubp1_43       | 95%                           | 93%                            |
| AMPL3593973 | Pf3D7_07_v3 | 404305  | 404638  | 1    | crt          | crt_7         | 93%                           | 92%                            |
| AMPL3594093 | Pf3D7_01_v3 | 197290  | 197637  | 1    | ubp1         | ubp1_29       | 91%                           | 89%                            |
| AMPL3592866 | Pf3D7_14_v3 | 293335  | 293566  | 2    | plasmepsin 2 | plasmepsin2_1 | 83%                           | 85%                            |
| AMPL3594092 | Pf3D7_01_v3 | 197119  | 197440  | 2    | ubp1         | ubp1_28       | 86%                           | 85%                            |
| AMPL3593953 | Pf3D7_13_v3 | 1725868 | 1726167 | 1    | K13          | K13_7         | 78%                           | 77%                            |
| AMPL3593061 | Pf3D7_08_v3 | 1374965 | 1375281 | 1    | hrp2         | hrp2_5        | 83%                           | 72%                            |
| AMPL3594112 | Pf3D7_01_v3 | 190943  | 191243  | 1    | ubp1         | ubp1_5        | 76%                           | 69%                            |
| AMPL3593072 | Pf3D7_13_v3 | 2841623 | 2841818 | 1    | hrp3         | hrp3_5        | 84%                           | 55%                            |
| AMPL3593068 | Pf3D7_13_v3 | 2840615 | 2840970 | 1    | hrp3         | hrp3_1        | 82%                           | 45%                            |
| AMPL3593069 | Pf3D7_13_v3 | 2840910 | 2841262 | 2    | hrp3         | hrp3_2        | 72%                           | 35%                            |

**Table S2. Amplicons with high genotype depth of coverage (>150).**

| Amplicon_ID | CHR         | START   | END     | POOL | Target | Amplicon name | median DP | 25% percentile | 75% percentile |
|-------------|-------------|---------|---------|------|--------|---------------|-----------|----------------|----------------|
| AMPL3592823 | Pf3D7_08_v3 | 1374462 | 1374730 | 1    | hrp2   | hrp2_3        | 268       | 15             | 1045           |
| AMPL3593064 | Pf3D7_08_v3 | 1374687 | 1375025 | 2    | hrp2   | hrp2_4        | 207       | 9              | 905            |
| AMPL3593414 | Pf_M76611   | 4421    | 4659    | 1    | CytB   | CytB_5        | 183       | 63             | 329.5          |
| AMPL3593965 | Pf3D7_07_v3 | 404974  | 405187  | 2    | crt    | crt_10        | 176       | 59             | 626            |
| AMPL3593990 | Pf3D7_05_v3 | 960959  | 961225  | 2    | mdr1   | mdr1_14       | 155       | 79             | 344            |
| AMPL3594105 | Pf3D7_01_v3 | 200424  | 200657  | 2    | ubp1   | ubp1_42       | 161       | 89.5           | 208            |

**Table S3. Amplicons in conserved regions.** These amplicons had no variants (i.e. only reference sequence detected) in the vcf, and in most cases have few variants detected in South America or even global (source: Pf4 - P. falciparum Community Project Data - Variant catalogue, <https://www.malariagen.net/apps/pf/4.0/#variation>). Only chromosomal variants are included in the Pf4 data-app.

| Amplicon_ID | CHR         | START   | END     | Target      | Amplicon name | nr. variants in Pf4 | nr. variants with NRAF>0 in SAM Pf4 |
|-------------|-------------|---------|---------|-------------|---------------|---------------------|-------------------------------------|
| AMPL3594061 | Pf3D7_01_v3 | 467940  | 468211  | mrp1        | mrp1_14       | 9                   | 1                                   |
| AMPL3594073 | Pf3D7_01_v3 | 468287  | 468636  | mrp1        | mrp1_16       | 5                   | 0                                   |
| AMPL3594094 | Pf3D7_01_v3 | 197577  | 197841  | ubp1        | ubp1_30       | 22                  | 1                                   |
| AMPL3594103 | Pf3D7_01_v3 | 199990  | 200337  | ubp1        | ubp1_41       | 22                  | 1                                   |
| AMPL3594125 | Pf3D7_01_v3 | 194496  | 194777  | ubp1        | ubp1_18       | 39                  | 0                                   |
| AMPL3594137 | Pf3D7_01_v3 | 198077  | 198428  | ubp1        | ubp1_32       | 38                  | 1                                   |
| AMPL3594139 | Pf3D7_01_v3 | 198618  | 198838  | ubp1        | ubp1_34       | 11                  | 0                                   |
| AMPL3593191 | Pf3D7_04_v3 | 749304  | 749551  | dhfr        | dhfr_7        | 0                   | 0                                   |
| AMPL3593194 | Pf3D7_04_v3 | 749721  | 749960  | dhfr        | dhfr_9        | 0                   | 0                                   |
| AMPL3593986 | Pf3D7_05_v3 | 960142  | 960478  | mdr1        | mdr1_10       | 24                  | 0                                   |
| AMPL3593988 | Pf3D7_05_v3 | 960549  | 960738  | mdr1        | mdr1_12       | 20                  | 0                                   |
| AMPL3593972 | Pf3D7_07_v3 | 404272  | 404376  | crt         | crt_6         | 3                   | 0                                   |
| AMPL3594014 | Pf3D7_08_v3 | 550217  | 550357  | dhps        | dhps_9        | 3                   | 0                                   |
| AMPL3593202 | Pf3D7_12_v3 | 2093070 | 2093321 | coronin     | coronin_6     | 10                  | 0                                   |
| AMPL3594039 | Pf3D7_12_v3 | 717975  | 718318  | ap2-mu      | ap2-mu_2      | 10                  | 0                                   |
| AMPL3594043 | Pf3D7_12_v3 | 719101  | 719460  | ap2-mu      | ap2-mu_7      | 14                  | 0                                   |
| AMPL3594044 | Pf3D7_12_v3 | 719401  | 719727  | ap2-mu      | ap2-mu_8      | 12                  | 1                                   |
| AMPL3592420 | Pf3D7_13_v3 | 2503916 | 2504048 | exonuclease | exonuclease_3 | 13                  | 0                                   |
| AMPL3592435 | Pf3D7_13_v3 | 2504281 | 2504427 | exonuclease | exonuclease_5 | 16                  | 0                                   |
| AMPL3593127 | Pf3D7_13_v3 | 1724836 | 1725019 | K13         | K13_2         | 13                  | 0                                   |
| AMPL3593956 | Pf3D7_13_v3 | 1726758 | 1726897 | K13         | K13_11        | 7                   | 0                                   |
| AMPL3593110 | Pf3D7_14_v3 | 293605  | 293961  | plasmepsin2 | plasmepsin2_3 | 23                  | 0                                   |
| AMPL3593186 | Pf_M76611   | 4210    | 4483    | CytB        | CytB_4        | NA                  | NA                                  |

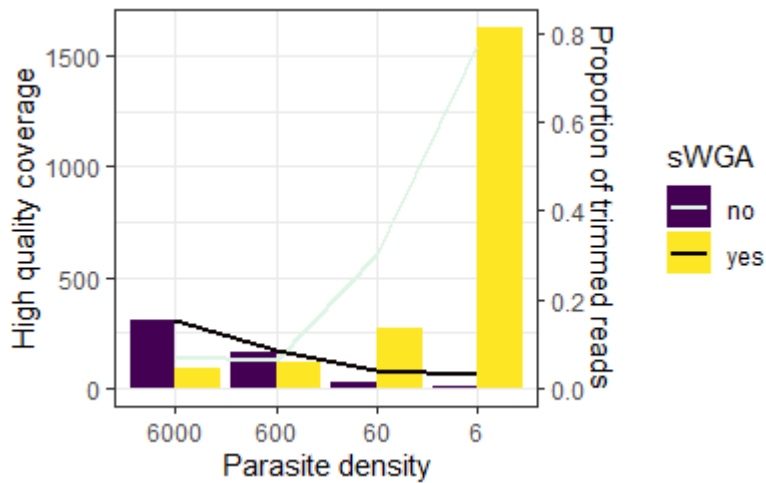

**Figure S2. Effect of selective whole genome amplification (sWGA) on high quality coverage (bars) and amount of trimming (lines) of a 3D7 serial dilution at different parasite densities (6000 - 6 p/μl) at DNA concentrations mimicking DBS samples. At parasite densities below 60 p/μl sWGA increases the number of high-quality reads and reduces the number of low-quality reads that are trimmed away.**

**Table S4. Error rates in 3D7 replicates without and with sWGA in different subsets of loci.**

| Type of variants                     | 3D7 without sWGA | 3D7 with sWGA |
|--------------------------------------|------------------|---------------|
| All variants in entire target region | 0.05% ± 0.01     | 0.13% ± 0.06  |
| Bi-allelic SNPs only                 | 0.008% ± 0.004   | 0.03% ± 0.01  |
| Indels only                          | 0.02% ± 0.005    | 0.04% ± 0.02  |
| “core” region only                   | 0.03% ± 0.01     | 0.11% ± 0.06  |
| Bi-allelic SNPs in core region only  | 0.006% ± 0.004   | 0.02% ± 0.01  |

**Table S5. Genotyping known variants in previously genotyped controls:** MRA 1241, MRA 1251, MRA 1255, MRA 150 (genotypes from literature (72, 92, 102, 103) and samples from Vietnam (104). Several replicates of each samples were tested. NA = no genotype was obtained at this position; wt = wildtype.

| Sample name | PF Ampliseq results    |                     |                                        |                                            |                                              | Previous data          |            |                                        |                                               |                                                           | er<br>ro<br>r | addi<br>tion<br>al<br>mix<br>ed | total<br>calls<br>ampli<br>seq | %<br>error |
|-------------|------------------------|---------------------|----------------------------------------|--------------------------------------------|----------------------------------------------|------------------------|------------|----------------------------------------|-----------------------------------------------|-----------------------------------------------------------|---------------|---------------------------------|--------------------------------|------------|
|             | <i>Crt: 72<br/>-76</i> | <i>K13</i>          | <i>mdr1:<br/>86,<br/>184,<br/>1246</i> | <i>dhfr:<br/>51, 59,<br/>108, 1<br/>64</i> | <i>dhps: 436,<br/>437, 540,<br/>581, 613</i> | <i>crt: 7<br/>2-76</i> | <i>K13</i> | <i>mdr1:<br/>86,<br/>184,<br/>1246</i> | <i>dhfr:<br/>51,<br/>59,<br/>108,<br/>164</i> | <i>Dhps:<br/>436,<br/>437, 5<br/>40,<br/>581,<br/>613</i> |               |                                 |                                |            |
| MRA 150     | CVIET                  | wt                  | YYD                                    | IRNI                                       | F,G,K,A,S                                    | CVIET                  | wt         | YYD                                    | IRNI                                          | FGKAS                                                     | 0             | 0                               | 18                             | 0.0%       |
|             | NA                     | wt                  | YYD                                    | IRNI                                       | F,K,A,S                                      |                        |            |                                        |                                               |                                                           | 0             | 0                               | 12                             | 0.0%       |
|             | CVIET                  | wt                  | NA                                     | NA                                         | NA                                           |                        |            |                                        |                                               |                                                           | 0             | 0                               | 6                              | 0.0%       |
| MRA 1241    | NA                     | I543T               | NYD                                    | IRNL                                       | S/F,G/A,E,<br>A,S                            | CVIET                  | I543T      | NYD                                    | IRNL                                          | FAEAS                                                     | 0             | 2                               | 13                             | 15.4%      |
|             | NA                     | I543T               | N_D                                    | _NI/<br>_NL                                | _E,A,S                                       |                        |            |                                        |                                               |                                                           | 0             | 1                               | 8                              | 12.5%      |
|             | CVIET                  | I543T               | N_                                     | IR__                                       | S/F,G/A,E,<br>A,A/S                          |                        |            |                                        |                                               |                                                           | 0             | 3                               | 15                             | 20.0%      |
| MRA 1251    | CVIET                  | C580Y               | NYD                                    | IRNI                                       | A/S,G,E,A,<br>A                              | CVIET                  | C580Y      | NYD                                    | IRNI                                          | AGEA<br>A                                                 | 0             | 1                               | 18                             | 5.6%       |
|             | NA                     | NA at<br>pos<br>580 | N_D                                    | _NI                                        | _E,A,A                                       |                        |            |                                        |                                               |                                                           | 0             | 0                               | 7                              | 0.0%       |
|             | CVIET                  | NA at<br>pos<br>580 | N_                                     | IR__                                       | NA                                           |                        |            |                                        |                                               |                                                           | 0             | 0                               | 8                              | 0.0%       |
| MRA 1255    | CVIET                  | NA at<br>pos<br>539 | YYD                                    | IRNI                                       | F,G,K,A,S                                    | CVIET                  | R539T      | YYD                                    | IRNI                                          | FGKAS                                                     | 0             | 0                               | 17                             | 0.0%       |
|             | NA                     | wt                  | YYD                                    | IRNI                                       | _K,A,S                                       |                        |            |                                        |                                               |                                                           | 1             | 0                               | 11                             | 9.1%       |
|             | CVIET                  | NA at<br>pos<br>539 | NA                                     | IR_/N<br>C_                                | NA                                           |                        |            |                                        |                                               |                                                           | 0             | 2                               | 7                              | 28.6%      |
| VTN 1       | CVIET                  | T511H               | NFD                                    | IRNI                                       | A,G,K/E,A,<br>A                              | CVIET                  | Y511H      | NFD                                    | IRNI                                          | -<br>GKAA                                                 | 0             | 1                               | 18                             | 0.0%       |
|             | NA                     | T511<br>+K189<br>T  | NFD                                    | NCNI                                       | S,G/A,K,<br>A                                |                        |            |                                        |                                               |                                                           | 3             | 1                               | 13                             | 23.1%      |
| VTN 2       | CVIDT<br>/CVIET        | C580Y<br>/I543T     | NYD                                    | IRNI/IR<br>NL                              | A/S/F,G,E,<br>A,A/S                          | CVIDT                  | C580Y      | NYD                                    | IRNI                                          | AGEA<br>A                                                 | 0             | 4                               | 19                             | 0.0%       |
|             | CVIDT<br>/CVIET        | het<br>I543T        | NYD                                    | IRNI/IR<br>NL                              | F,G,E,A,A/<br>S                              |                        |            |                                        |                                               |                                                           | 1             | 2                               | 18                             | 5.6%       |
| VTN 3       | CVIET                  | C580Y<br>/I543T     | NYD                                    | IRNI/IR<br>NL                              | A/S/F,G,K/<br>N,A/G,A/S                      | CVIET                  | C580Y      | _F_                                    | IRNL                                          | S_NG_                                                     | 1             | 3                               | 19                             | 5.3%       |
| VTN 4       | CVIET                  | C580Y               | NFD                                    | IRNL                                       | S,G,N,G,A                                    | CVIET                  | C580Y      | _F_                                    | IRNL                                          | S_NG_                                                     | 0             | 0                               | 17                             | 0.0%       |
|             | NA                     | C580Y               | _FD                                    | IR_L                                       | S,G,-,-                                      |                        |            |                                        |                                               |                                                           | 0             | 0                               | 8                              | 0.0%       |
|             |                        |                     |                                        |                                            |                                              |                        |            |                                        |                                               |                                                           | 6             | 20                              | 216                            | 2.8%       |

**Table S6. Detection limit of variant loci in 3D7-Dd2 mock samples**

| proportion 3D7 DNA | proportion Dd2 DNA | nr of heterozygote SNP genotypes | nr of homozygote reference SNP genotypes | Proportion Dd2 alleles detected |
|--------------------|--------------------|----------------------------------|------------------------------------------|---------------------------------|
| 50%                | 50%                | 63                               | 4                                        | 94.0%                           |
| 80%                | 20%                | 28                               | 36                                       | 43.8%                           |
| 95%                | 5%                 | 3                                | 65                                       | 4.4%                            |
| 99%                | 1%                 | 0                                | 68                                       | 0%                              |
| 99.5%              | 0.5%               | 0                                | 69                                       | 0%                              |

**Table S7. Complexity of infection analyses.**

COI determined with McCOIL algorithms (categorical and proportional) with different subsets of biallelic variants: 1) all biallelic variants; 2) all variants (core variants) excluding *hrp2*, MS regions and mitochondrial and apicoplast variants; and 3) the 28-SNP barcode variants. Because of the large differences observed between the two McCOIL methods, we estimated the proportions of single and multiple clone infections with an additional methods based on the number of heterozygous variants in 1) the 28-SNP barcode, 2) *ama1*, 3) core variants, and 4) MS targeted regions. The mode (most frequent value) from four measurements for single vs. multiple clone (heterozygotes in 1) MS, 2) *ama1* and 3) barcode regions and 4) McCOIL proportional barcode) was determined. The highest number of clones estimated with either the McCOIL categorical or proportional algorithm (categorical uses diploid genotype calls, proportional uses allele depths) was two clones (COI =2). However, a considerably larger proportion of single clone infections was predicted with the categorical method, especially when using more than 28 SNPs. Estimates of single clone infections using the heterozygous loci in the 28-SNP barcode and *ama1* were similar to the 28 SNP proportional McCOIL method (83.9%, 85.0% and 83.1% single clone infections, respectively). With the MS alleles a much larger proportion of multiple clone infections was estimated (61.1%).

|                       |                          | COI=1 | COI>1 | % single clone | 95% CI   |
|-----------------------|--------------------------|-------|-------|----------------|----------|
| McCOIL categorical    | all biallelic variants   | 208   | 0     | 100%           |          |
|                       | core variants            | 166   | 1     | 99.4%          | 99-100%  |
|                       | 28-SNP barcode variants. | 192   | 2     | 99.0%          | 98-100%  |
| McCOIL proportional   | all biallelic variants   | 3     | 64    | 4.5%           | 1.5-9.6% |
|                       | core variants            | 12    | 112   | 9.7%           | 6-15%    |
|                       | 28-SNP barcode variants. | 123   | 25    | 83.1%          | 78-89%   |
| Heterozygous variants | MS from NGS              | 77    | 121   | 38.9%          | 32-46%   |
|                       | 28-SNP barcode           | 213   | 41    | 83.9%          | 80-88%   |
|                       | SNPs in AMA1             | 216   | 38    | 85.0%          | 81-89%   |
|                       | SNPs in core (>5 SNPs)   | 85    | 169   | 71.3%          | 66-77%   |
| <b>Mode</b>           |                          | 191   | 51    | 78.9%          | 74-84%   |



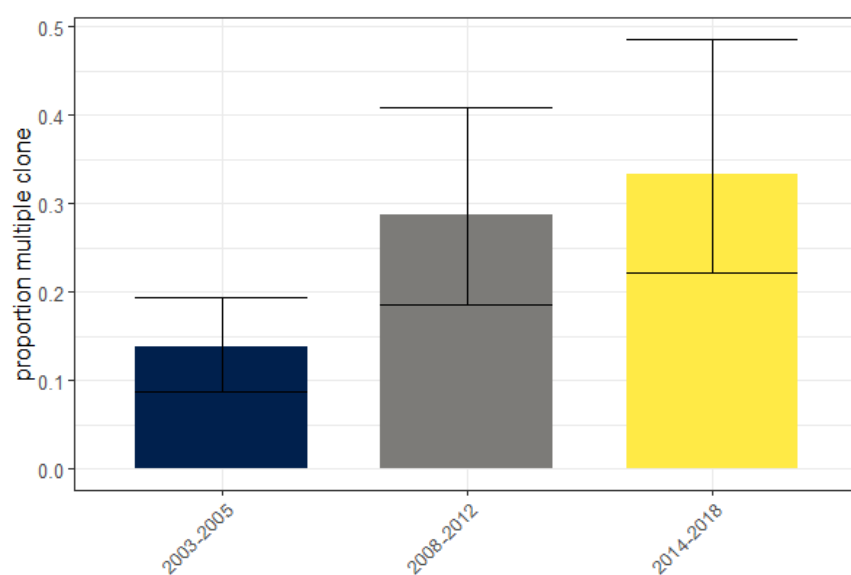

**Figure S3. Proportion multiple clone infections in Peru.** The proportion of multiple clone infections (with 95% confidence interval) was plotted for three time periods, and was higher in 2008-2018 than in 2003-2005 ( $p = 0.0005$ ,  $X^2$ ). Multiple clone infections determined as mode of the different approaches.

**Table S8. Pairwise comparison of *hrp2/hrp3* classification by PCR and Pf AmpliSeq** in study samples tested with both methods ( $n = 10$ ). PCR genotypes from Gamboa *et al.* 2010 (2).

| PCR                            | Pf AmpliSeq                    |                                |                                |                                           | Final result   |
|--------------------------------|--------------------------------|--------------------------------|--------------------------------|-------------------------------------------|----------------|
|                                | <i>hrp2+</i> /<br><i>hrp3-</i> | <i>hrp2-</i> /<br><i>hrp3-</i> | <i>hrp2-</i> /<br><i>hrp3+</i> | <i>hrp2</i><br>undefined/<br><i>hrp3+</i> |                |
| <i>hrp2+</i> /<br><i>hrp3-</i> | 1                              |                                |                                |                                           | RDT detectable |
| <i>hrp2-</i> /<br><i>hrp3-</i> |                                | 4                              |                                |                                           | RDT failure    |
| <i>hrp2+</i> /<br><i>hrp3+</i> |                                |                                |                                | 3                                         | RDT detectable |
| <i>hrp2-</i> /<br><i>hrp3+</i> |                                |                                | 1                              | 1                                         | RDT detectable |
| <b>Final result</b>            | RDT detectable                 | RDT failure                    | RDT detectable                 | RDT detectable                            |                |

**Table S9 Barcode SNPs.** Chromosomal position and type of the barcode variants are listed. In addition allele frequencies (AF) for the reference allele (REF) and alternate allele (ALT) from PlasmoDB and in study samples (n=254) from Peru.

| CHROM       | POS     | TYPE  | plasmoDB         |              |          |                           | Samples (n=254) |        |              |
|-------------|---------|-------|------------------|--------------|----------|---------------------------|-----------------|--------|--------------|
|             |         |       | Reference allele | major allele | Major AF | Minor allele (if not ref) | REF AF          | ALT AF | major allele |
| Pf3D7_01_v3 | 205066  | SNP   | G                | G            | 0.66     | A                         | 0.81            | 0.19   | G            |
| Pf3D7_01_v3 | 339436  | SNP   | A                | G            | 0.59     |                           | 0.15            | 0.85   | G            |
| Pf3D7_02_v3 | 519457  | SNP   | C                | T            | 0.68     |                           | 0.61            | 0.39   | C            |
| Pf3D7_02_v3 | 694307  | SNP   | A                | A            | 0.54     | G                         | 0.03            | 0.97   | G            |
| Pf3D7_03_v3 | 361199  | SNP   | C                | C            | 0.65     | T                         | 0.68            | 0.32   | C            |
| Pf3D7_03_v3 | 849476  | SNP   | C                | C            | 0.64     |                           | 0.99            | 0.01   | C            |
| Pf3D7_04_v3 | 691961  | SNP   | C                | T            | 0.53     | T                         | 0.57            | 0.43   | C            |
| Pf3D7_04_v3 | 770292  | SNP   | A                | A            | 0.74     | G                         | 0.77            | 0.23   | A            |
| Pf3D7_05_v3 | 921893  | SNP   | T                | T            | 0.58     | A                         | 1.00            | 0.00   | T            |
| Pf3D7_05_v3 | 1188394 | SNP   | C                | C            | 0.84     | T                         | 0.79            | 0.21   | C            |
| Pf3D7_06_v3 | 148827  | SNP   | T                | T            | 0.8      | C                         | 0.64            | 0.36   | T            |
| Pf3D7_06_v3 | 636044  | SNP   | A                | C            | 0.58     |                           | 0.67            | 0.33   | A            |
| Pf3D7_07_v3 | 455494  | SNP   | A                | A            | 0.57     |                           | 0.79            | 0.21   | A            |
| Pf3D7_07_v3 | 782111  | SNP   | T                | T            | 0.92     | G                         | 0.91            | 0.09   | T            |
| Pf3D7_08_v3 | 501042  | SNP   | T                | T            | 0.56     | C                         | 0.27            | 0.73   | C            |
| Pf3D7_08_v3 | 803172  | SNP   | T                | T            | 0.82     | G                         | 0.10            | 0.90   | G            |
| Pf3D7_09_v3 | 231065  | SNP   | C                | A            | 0.5      |                           | 0.80            | 0.20   | C            |
| Pf3D7_09_v3 | 1005351 | SNP   | G                | G            | 0.65     | C                         | 0.49            | 0.51   | C            |
| Pf3D7_10_v3 | 341106  | SNP   | A                | A            | 0.54     | G                         | 0.01            | 0.99   | G            |
| Pf3D7_10_v3 | 1172712 | SNP   | A                | G            | 0.65     | G                         | 0.25            | 0.75   | G            |
| Pf3D7_11_v3 | 874948  | SNP   | G                | A            | 0.7      | A                         | 0.43            | 0.57   | A            |
| Pf3D7_11_v3 | 1505533 | SNP   | T                | T            | 0.92     | C                         | 0.98            | 0.02   | T            |
| Pf3D7_12_v3 | 1127000 | INDEL | T                |              |          |                           | 0.30            | 0.70   | TA           |
| Pf3D7_12_v3 | 1552084 | SNP   | T                | C            | 0.86     | C                         | 0.29            | 0.71   | C            |
| Pf3D7_13_v3 | 1595988 | SNP   | T                | C            | 0.54     | C                         | 0.68            | 0.32   | T            |
| Pf3D7_13_v3 | 1827569 | SNP   | T                | T            | 0.62     | A                         | 0.50            | 0.50   | T            |
| Pf3D7_14_v3 | 832594  | SNP   | T                | T            | 0.87     | C                         | 0.61            | 0.39   | T            |
| Pf3D7_14_v3 | 1381943 | SNP   | T                | T            | 0.94     | C                         | 0.01            | 0.99   | C            |

**Figure S4. Principal component analysis of samples (n=254) collected in Peru between 2003 and 2018.** PCA is shown for all biallelic loci in the core region along the first 2 principal components (A) and 3<sup>rd</sup> and 4<sup>th</sup> PCs (B). Isolates are colored by year (A& B) and by district (C&D), and from earlier years (blue and purple colors) are more diverse than later isolates (greens & yellows), which form two clusters. All samples with unknown district were collected in the rural communities south of Iquitos.

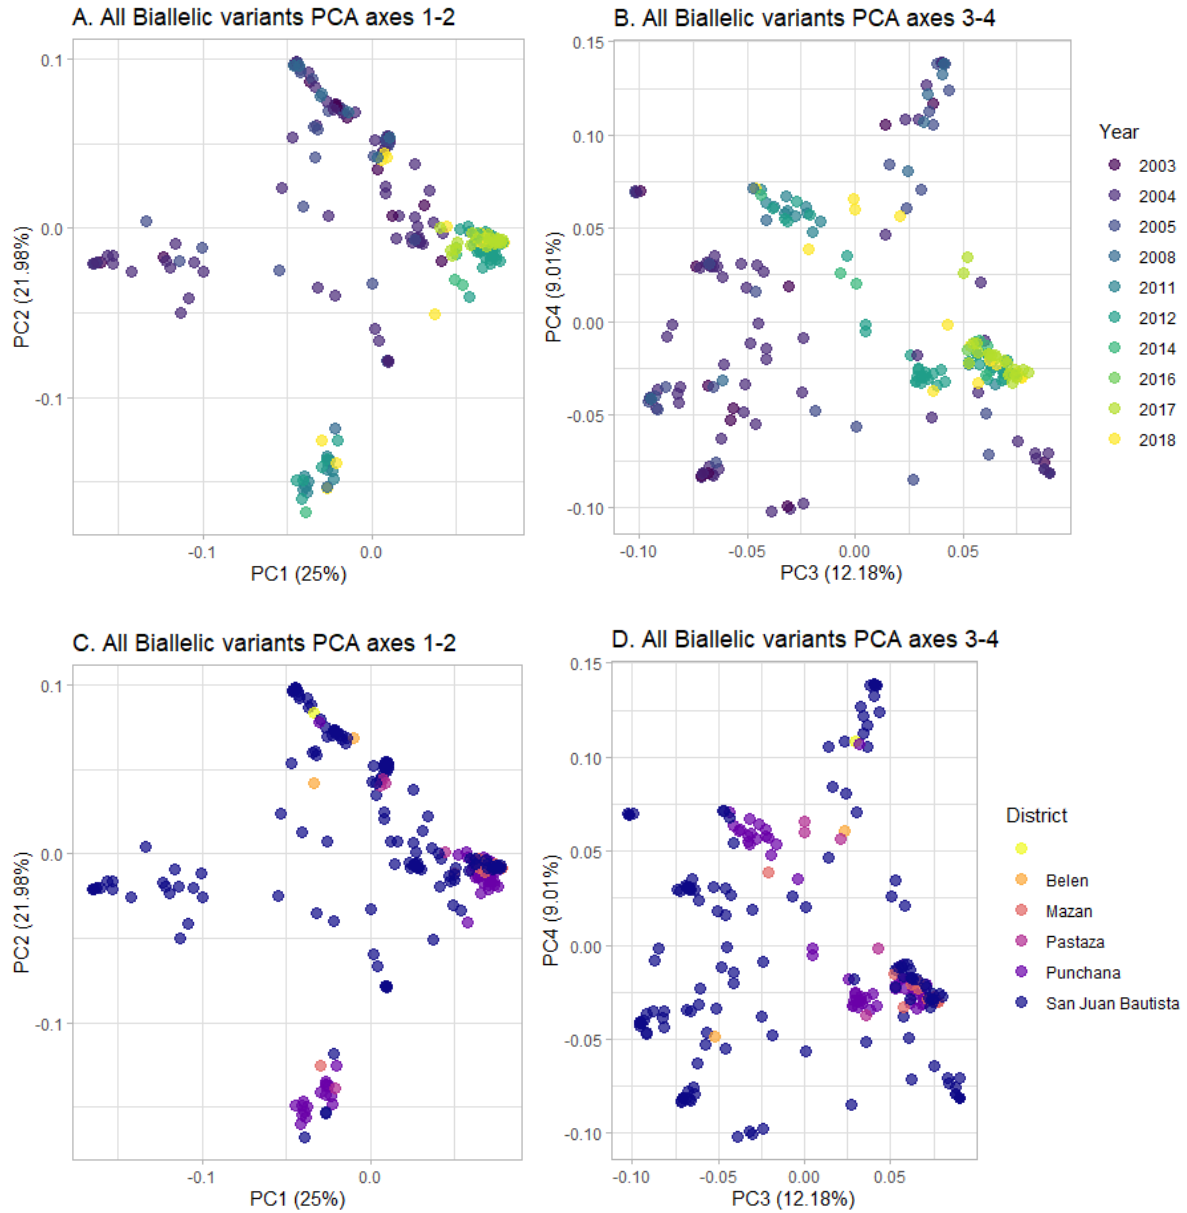

**Figure S5. Expected Heterozygosity by time period and district.** Number of individuals for each population:  $n_{2003-2005} = 1$ ,  $n_{2003-2005\_Belen} = 1$ ,  $n_{2003-2005\_San\ Juan\ Bautista} = 116$ ,  $n_{2008-2012\_Punchana} = 59$ ,  $n_{2008-2012\_San\ Juan\ Bautista} = 6$ ,  $n_{2014-2018\_San\ Juan\ Bautista} = 24$ ,  $n_{2014-2018\_Mazan} = 10$ ,  $n_{2014-2018\_Pastaza} = 4$ .

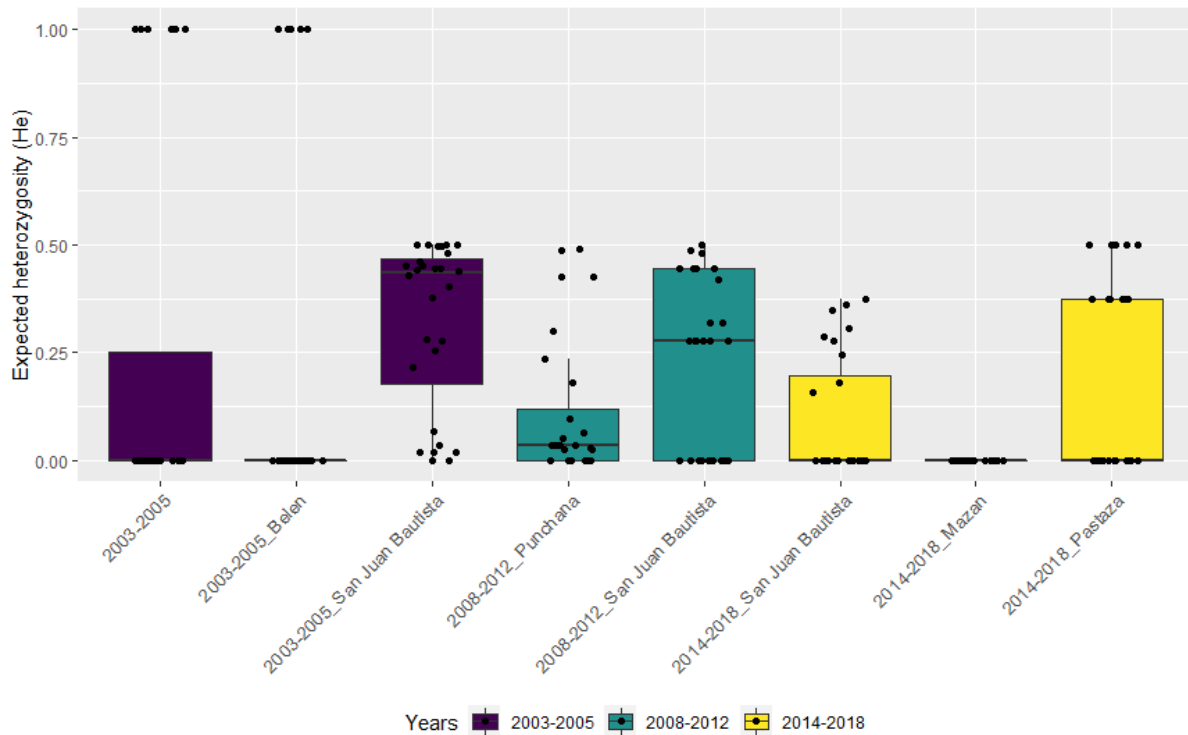

**Table S10. p-values for pairwise comparisons of  $H_e$**  using Wilcoxon rank sum test with Benjamini-Hochberg correction for multiple testing. Significant p-values ( $<0.05$ ) are indicated in bold.

|                             | 2003-2005 unspecified | 2003-2005 Belen  | 2003-2005 San Juan Bautista | 2008-2012 Punchana | 2008-2012 San Juan Bautista | 2014-2018 San Juan Bautista | 2014-2018 Mazan  |
|-----------------------------|-----------------------|------------------|-----------------------------|--------------------|-----------------------------|-----------------------------|------------------|
| 2003-2005 Belen             | 0.61                  | -                | -                           | -                  | -                           | -                           | -                |
| 2003-2005 San Juan Bautista | <b>0.009</b>          | <b>&gt;0.001</b> | -                           | -                  | -                           | -                           | -                |
| 2008-2012 Punchana          | 0.117                 | <b>0.018</b>     | <b>0.0010</b>               | -                  | -                           | -                           | -                |
| 2008-2012 San Juan Bautista | 0.20                  | <b>0.039</b>     | <b>0.045</b>                | 0.24               | -                           | -                           | -                |
| 2014-2018 San Juan Bautista | 0.95                  | 0.58             | <b>&gt;0.001</b>            | 0.12               | <b>0.018</b>                | -                           | -                |
| 2014-2018 Mazan             | <b>0.015</b>          | <b>0.039</b>     | <b>&gt;0.001</b>            | <b>&gt;0.001</b>   | <b>&gt;0.001</b>            | <b>0.0046</b>               | -                |
| 2014-2018 Pastaza           | 0.66                  | 0.23             | <b>0.034</b>                | 0.93               | 0.72                        | 0.12                        | <b>&gt;0.001</b> |

**Figure S6. Genetic differentiation between parasite populations in the three time periods,** measured as  $F_{ST}$  (Weir & Cockerham, 1984),  $G'_{ST}$  (Hedrick, 2005) and Jost's D (Jost 2008) using the R package *diversity*. Number of individuals for each population:  $n_{2003-2005} = 118$ ;  $n_{2008-2012} = 65$ ;  $n_{2014-2018} = 38$ .

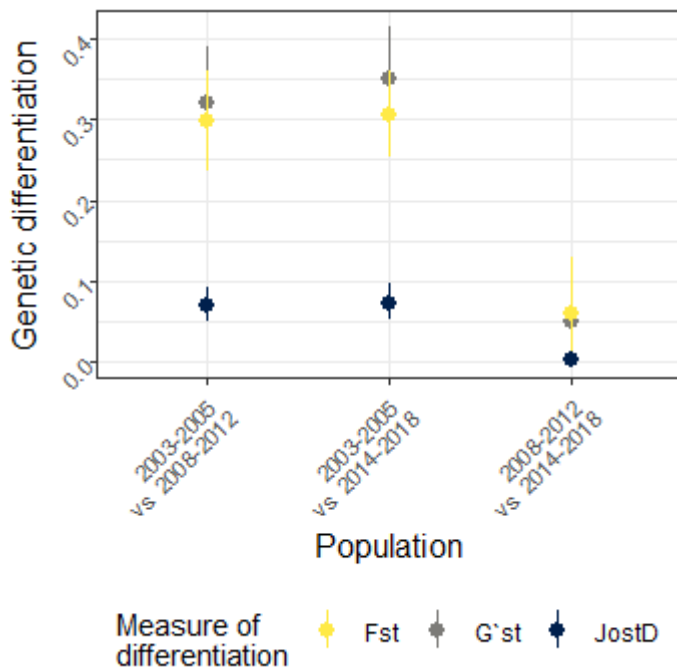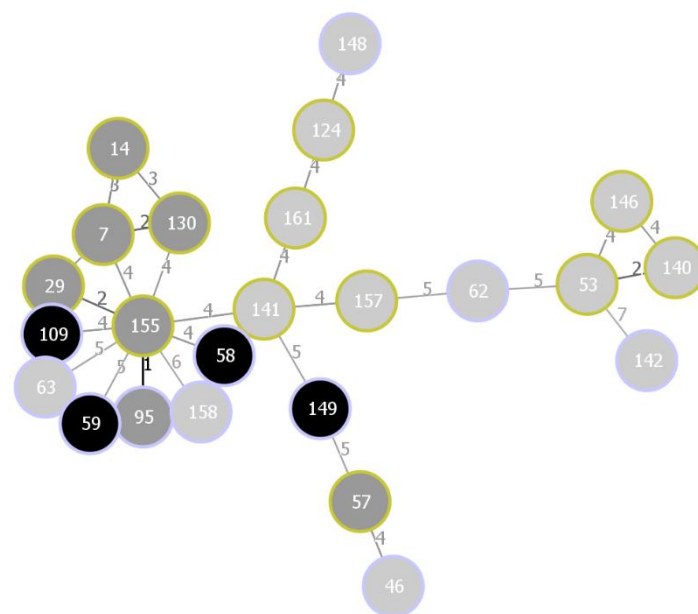

**Figure S7. Minimum spanning network (nLV graph) of multilocus lineages.** Minimum spanning network generated with *goeBURST* distance,  $nLV = 4$ , created in *Phylovis* v2.0 with barcode genotypes for each lineage. Number correspond to lineages from table 2 main document. Light grey: first observed in 2003-2005, dark-grey: first observed in 2008-2012, black: first observed in 2014-2018. After 2008, lineage no. 155 becomes predominant, with many other circulating lineages in that time related to lineage 155. Lineage 149 and 57 found in Pastaza in 2018 had a different origin.

**Table S11. Linkage disequilibrium** expressed as  $\bar{r}D$  per population (time period and/or district), measured with 999 resamplings using the poppr package in R.

| years     | district          | n   | $\bar{r}D$ | p-value |
|-----------|-------------------|-----|------------|---------|
| 2003-2018 | All               | 221 | 0.155      | 0.001   |
| 2003-2005 | All               | 118 | 0.149      | 0.001   |
| 2008-2012 | All               | 65  | 0.250      | 0.001   |
| 2014-2018 | All               | 38  | 0.299      | 0.001   |
| 2003-2005 | San Juan Bautista | 116 | 0.15       | 0.001   |
| 2008-2012 | San Juan Bautista | 6   | 0.38       | 0.001   |
| 2008_2012 | Punchana          | 59  | 0.222      | 0.001   |
| 2014-2018 | San Juan Bautista | 24  | 0.408      | 0.001   |

**Table S12. 28-SNP barcode loci that become fixed over time**

| Chromosome  | Position | Fixed in  |
|-------------|----------|-----------|
| Pf3D7_02_v3 | 519457   | 2014-2018 |
| Pf3D7_02_v3 | 694307   | 2014-2018 |
| Pf3D7_03_v3 | 849476   | 2008-2018 |
| Pf3D7_04_v3 | 691961   | 2014-2018 |
| Pf3D7_05_v3 | 921893   | 2003-2018 |
| Pf3D7_06_v3 | 636044   | 2014-2018 |
| Pf3D7_07_v3 | 455494   | 2014-2018 |
| Pf3D7_07_v3 | 782111   | 2008-2018 |
| Pf3D7_08_v3 | 803172   | 2008-2018 |
| Pf3D7_10_v3 | 341106   | 2003-2018 |
| Pf3D7_11_v3 | 1505533  | 2008-2018 |
| Pf3D7_12_v3 | 1127000  | 2014-2018 |
| Pf3D7_12_v3 | 1552084  | 2008-2018 |
| Pf3D7_14_v3 | 1381943  | 2008-2018 |

**Table S13 Contributions of alleles to DAPC.**

| variant position   | contributing factor | PC in DAPC | annotation of alt allele | gene ID       | gene name                     | 28-SNP barcode      |
|--------------------|---------------------|------------|--------------------------|---------------|-------------------------------|---------------------|
| Pf3D7_01_v3_192590 | 0.013224389         | 2          | Lys774Asn                | PF3D7_0104300 | ubp1                          |                     |
| Pf3D7_01_v3_196974 | 0.011249826         | 2          | Leu2236Leu               | PF3D7_0104300 | ubp1                          |                     |
| Pf3D7_01_v3_199237 | 0.008442663         | 2          | Lys2912Asn               | PF3D7_0104300 | ubp1                          |                     |
| Pf3D7_01_v3_205066 | 0.007943108         | 2          | Phe130Phe                | PF3D7_0104500 | unknown protein               | Yes                 |
| Pf3D7_01_v3_339432 | 0.035879398         | 1          | Glu755Glu                | PF3D7_0108300 | unknown protein               | in barcode amplicon |
| Pf3D7_02_v3_519457 | 0.025872597         | 2          | Ile3228Ile               | PF3D7_0212500 | unknown protein               | in barcode amplicon |
| Pf3D7_03_v3_361195 | 0.007454305         | 2          | Arg1626Lys               | PF3D7_0308100 | zinc finger protein, putative | in barcode amplicon |

|                     |             |   |                    |               |                                                         |                     |
|---------------------|-------------|---|--------------------|---------------|---------------------------------------------------------|---------------------|
| Pf3D7_03_v3_361199  | 0.008475745 | 2 | Thr1627Thr         | PF3D7_0308100 | zinc finger protein, putative                           | Yes                 |
| Pf3D7_04_v3_748235  | 0.0860365   | 1 | Cys50Arg           | PF3D7_0417200 | pfdhfr                                                  |                     |
| Pf3D7_04_v3_748235  | 0.009881925 | 2 | Cys50Arg           | PF3D7_0417200 | pfdhfr                                                  |                     |
| Pf3D7_04_v3_748239  | 0.01967936  | 1 | Asn51Ile           | PF3D7_0417200 | pfdhfr                                                  |                     |
| Pf3D7_04_v3_748239  | 0.009615098 | 2 | Asn51Ile           | PF3D7_0417200 | pfdhfr                                                  |                     |
| Pf3D7_04_v3_748577  | 0.02383201  | 1 | Ile164Leu          | PF3D7_0417200 | pfdhfr                                                  |                     |
| Pf3D7_04_v3_770292  | 0.032732908 | 2 | Lys4667Glu         | PF3D7_0417400 | unknown protein                                         | Yes                 |
|                     |             |   |                    |               |                                                         | in barcode amplicon |
| Pf3D7_05_v3_1188491 | 0.032529119 | 1 | Phe152Phe          | PF3D7_0529000 | unknown protein                                         |                     |
| Pf3D7_05_v3_960989  | 0.01175819  | 1 | Ser1034Cys         | PF3D7_0523000 | pfmdr1                                                  |                     |
| Pf3D7_05_v3_960989  | 0.009963482 | 2 | Ser1034Cys         | PF3D7_0523000 | pfmdr1                                                  |                     |
| Pf3D7_05_v3_961625  | 0.031696855 | 1 | Asp1246Tyr         | PF3D7_0523000 | pfmdr1                                                  |                     |
|                     |             |   |                    |               | AT-rich interactive domain-containing protein, putative | Yes                 |
| Pf3D7_06_v3_148827  | 0.010701516 | 1 | Val39Val           | PF3D7_0603600 |                                                         |                     |
|                     |             |   |                    |               | AT-rich interactive domain-containing protein, putative | Yes                 |
| Pf3D7_06_v3_148827  | 0.017232716 | 2 | Val39Val           | PF3D7_0603600 |                                                         |                     |
|                     |             |   |                    |               | ribonuclease, putative                                  | Yes                 |
| Pf3D7_06_v3_636044  | 0.046900879 | 2 | Ile1310Met         | PF3D7_0615400 |                                                         |                     |
| Pf3D7_07_v3_455494  | 0.007594591 | 2 | Asn927Asn          | PF3D7_0710100 | unknown protein                                         | Yes                 |
|                     |             |   |                    |               |                                                         | in barcode amplicon |
| Pf3D7_07_v3_455550  | 0.007107321 | 2 | Ile909Leu          | PF3D7_0710100 | unknown protein                                         |                     |
|                     |             |   |                    |               | RuvB-like helicase 1                                    | Yes                 |
| Pf3D7_08_v3_501042  | 0.018331353 | 2 | Glu176Glu          | PF3D7_0809700 |                                                         |                     |
|                     |             |   |                    |               | RuvB-like helicase 1                                    | in barcode amplicon |
| Pf3D7_08_v3_501054  | 0.017953778 | 2 | Val172Val          | PF3D7_0809700 |                                                         |                     |
| Pf3D7_08_v3_549993  | 0.024643639 | 1 | Lys540Glu          | PF3D7_0810800 | pfdhps                                                  |                     |
| Pf3D7_08_v3_549993  | 0.007753441 | 2 | Lys540Glu          | PF3D7_0810800 | pfdhps                                                  |                     |
| Pf3D7_09_v3_1005351 | 0.036558277 | 2 | Glu1919Gln         | PF3D7_0924600 | unknown protein                                         | Yes                 |
|                     |             |   |                    |               | calcium-dependent protein kinase 6                      | Yes                 |
| Pf3D7_11_v3_874948  | 0.012525102 | 2 | Gly973Asp          | PF3D7_1122800 |                                                         |                     |
| Pf3D7_12_v3_2092606 | 0.013989583 | 2 | Val62Met           | PF3D7_1251200 | pfcoronin                                               |                     |
| Pf3D7_12_v3_2093692 | 0.014452113 | 2 | Val424Ile          | PF3D7_1251200 | pfcoronin                                               |                     |
|                     |             |   |                    |               |                                                         |                     |
| Pf3D7_12_v3_2094242 | 0.00941445  | 1 | downstream variant | PF3D7_1251200 | pfcoronin                                               |                     |
|                     |             |   |                    |               | inner membrane complex protein                          | Yes                 |
| Pf3D7_13_v3_1827569 | 0.016409733 | 1 | Tyr345Asn          | PF3D7_1345600 |                                                         |                     |
|                     |             |   |                    |               | inner membrane complex protein                          | Yes                 |
| Pf3D7_13_v3_1827569 | 0.010051953 | 2 | Tyr345Asn          | PF3D7_1345600 |                                                         |                     |
| Pf3D7_14_v3_294796  | 0.022437109 | 2 | Gln442His          | PF3D7_1408000 | plasmepsin II                                           |                     |

**Figure S8. Copy number variations in A) *plasmepsin II* gene (*pm2*) and B) *multidrug resistance gene 1* (*mdr1*)** in a subset of samples from Peru collected between 2003-2018. Samples with copy numbers between 0.5 - 1.5 (dotted lines) relative to 3D7 are considered to have single copies of the respective genes. Sample sizes:  $n_{2003-2005} = 31$ ,  $n_{2008-2012} = 13$ ,  $n_{2014-2018} = 34$ .

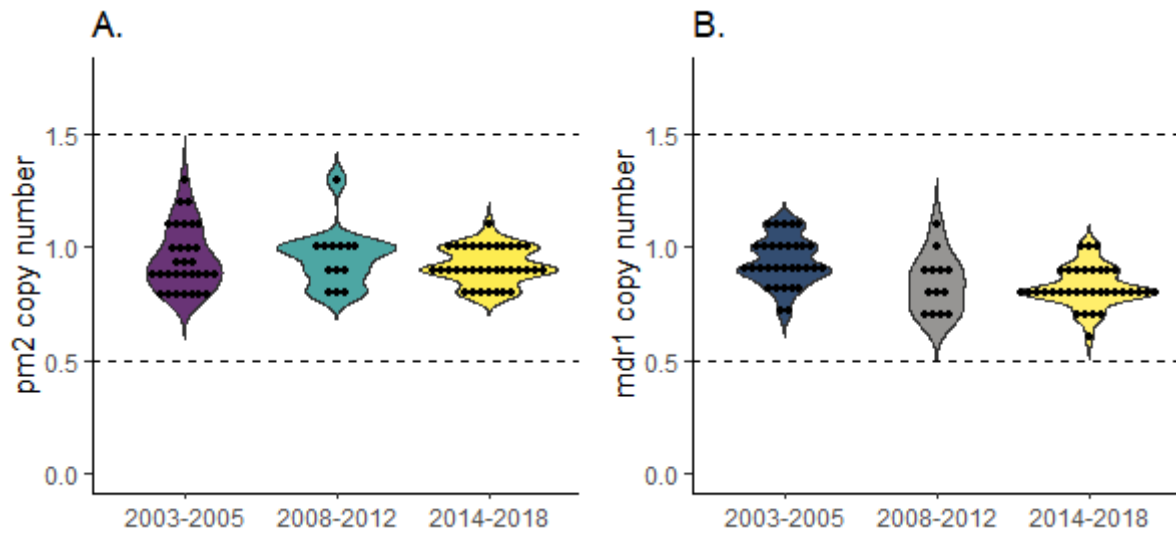



**Table S14 Cost comparison AmpliSeq vs WGS at comparable depth and per kit.**

| WGS on MiSeq                            | Price for 1 kit (24 samples) |                | Price per sample for 1 run with 12 samples (20X-50X coverage) |              |
|-----------------------------------------|------------------------------|----------------|---------------------------------------------------------------|--------------|
|                                         | Peru                         | Belgium        |                                                               |              |
| Nextera XT DNA Library Kit (24 samples) | \$1,520                      | \$960          | \$63                                                          | \$40         |
| Nextera XT Index Kit (24 indexes)       | \$455                        | \$290          | \$19                                                          | \$12         |
| MiSeq Reagent Kit v3 (600-cycles)       | \$2,415                      | \$1,780        | \$201                                                         | \$148        |
| <b>total</b>                            | <b>\$4,390</b>               | <b>\$3,030</b> | <b>\$283</b>                                                  | <b>\$200</b> |

| AmpliSeq on Miseq                    | Price for 1 kit (96 samples) |                 | Price per sample for 1 run with 96 samples (500X-1000X coverage) |              | Price per sample for 1 run with 384 samples (50X-100X coverage) |              |
|--------------------------------------|------------------------------|-----------------|------------------------------------------------------------------|--------------|-----------------------------------------------------------------|--------------|
|                                      | Peru                         | Belgium         | Peru                                                             | Belgium      | Peru                                                            | Belgium      |
| Ampliseq library plus for 96 samples | \$14,445                     | \$10,840        | \$150                                                            | \$113        | \$150                                                           | \$113        |
| AmpliSeq Index kit                   | \$950                        | \$715           | \$10                                                             | \$7          | \$10                                                            | \$7          |
| Miseq reagent kit v3                 | \$2,415                      | \$1,780         | \$25                                                             | \$19         | \$6                                                             | \$5          |
| custom pools                         | \$2,210                      | \$2,210         | \$0.37                                                           | \$0.37       | \$0.37                                                          | \$0.37       |
| <b>total</b>                         | <b>\$20,020</b>              | <b>\$15,545</b> | <b>\$185</b>                                                     | <b>\$139</b> | <b>\$166</b>                                                    | <b>\$125</b> |

Note: these prices are in USD and rounded for the table. Belgian prices in euros have been converted to USD with an exchange rate of 0.88 USD to 1 EUR.

Prices for WGS analysis do not include preprocessing of the samples, for example with sWGA, which is usually required for DBS samples and would add another \$30-\$50 per sample

Secondary reagents required during both library preparation procedures not included in the kits, such as AMPureXP beads are not included in these prices and add similar costs to both.

**Table S15: Laboratory strains included in assay validation**

| Laboratory isolates    | tested with sWGA |
|------------------------|------------------|
| 3D7                    |                  |
| Dd2 (MRA-150)          |                  |
| CamWT_C580Y (MRA-1251) |                  |
| Dd2_R539T (MRA-1255)   |                  |
| IPC 4912 (MRA-1241)    |                  |

|                                                                                  |   |
|----------------------------------------------------------------------------------|---|
| ten-fold serial dilution of 3D7 parasite DNA (60.000 p/μl to 6 p/μl)             | x |
| 3D7:Dd2 mixtures (20,000 p/μL): 50-50% ratio, 80-20%, 95-5%, 99-1% and 99.5-0.5% |   |
| Uninfected human DNA                                                             |   |

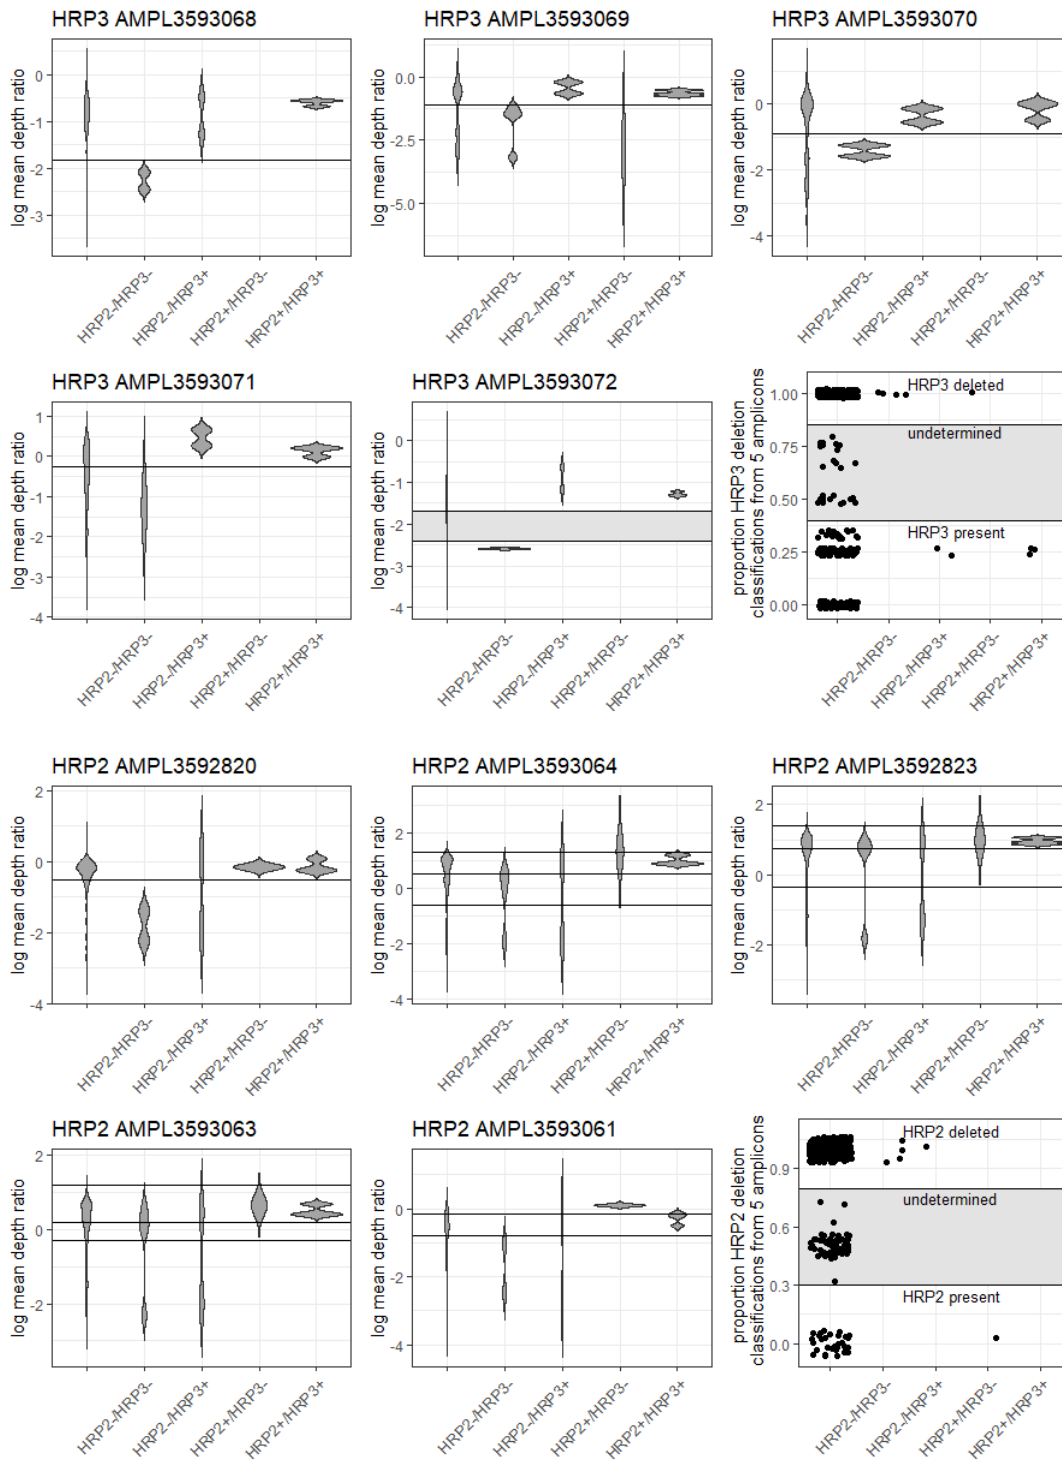

**Figure S9.** Distributions of log mean depth ratio's for all samples for each *hrp3* amplicon (AMPL3593072, AMPL3593071, AMPL3593070, AMPL3593069, AMPL3593068) and *hrp2* amplicon (AMPL3592820, AMPL3593064, AMPL3592823, AMPL3593063, AMPL3593061), plotted by *hrp2/hrp3* PCR results (not tested, *hrp2-/hrp3-*, *hrp2-/hrp3+*, *hrp2+/hrp3-*, *hrp2+/hrp3+*), with thresholds used to define deletions or presence of the genes (Supp. Table 2). To classify a sample as *hrp2* and *hrp3* deleted or non-deleted, the number of amplicons per sample and gene with deletions was summed and then divided by the total number of amplicons (with or without the deletion). If the resulting ratio was >0.8 a sample was classified as having a deletion in *hrp3* or *hrp2*; if the ratio was < 0.3 for *hrp2* or <0.4 for *hrp3*, the samples was classified as without deletion in that gene.

Table S16. Cutoff thresholds for *hrp2* and *hrp3* determination of deletions for each amplicon.

| Gene        | Amplicon                          | Threshold<br>log mean<br>depth ratio | Result          |               |
|-------------|-----------------------------------|--------------------------------------|-----------------|---------------|
| <i>hrp3</i> | AMPL3593072                       | <= -2.4                              | <i>hrp3</i> -   |               |
|             | AMPL3593072                       | >= -1.7                              | <i>hrp3</i> +   |               |
|             | AMPL3593071                       | <= -0.25                             | <i>hrp3</i> -   |               |
|             | AMPL3593070                       | < -0.9                               | <i>hrp3</i> -   |               |
|             | AMPL3593070                       | >= -0.9                              | <i>hrp3</i> +   |               |
|             | AMPL3593069                       | < -1.10                              | <i>hrp3</i> -   |               |
|             | AMPL3593068                       | < -1.82                              | <i>hrp3</i> -   |               |
|             | AMPL3593068                       | >= -1.82                             | <i>hrp3</i> +   |               |
| <i>hrp2</i> | AMPL3592820                       | < -0.50                              | <i>hrp2</i> -   |               |
|             | AMPL3592820                       | >= -0.50                             | & <i>hrp3</i> - | <i>hrp2</i> + |
|             |                                   |                                      | & <i>hrp3</i> + | undetermined  |
|             | AMPL3593064                       | < -0.60                              | <i>hrp2</i> -   |               |
|             | AMPL3593064                       | < 0.5                                | & <i>hrp3</i> + | <i>hrp2</i> - |
|             | AMPL3593064                       | >1.30                                | & <i>hrp3</i> - | <i>hrp2</i> + |
|             | AMPL3592823                       | <-0.35                               | <i>hrp2</i> -   |               |
|             | AMPL3592823                       | <0.75                                | & <i>hrp3</i> + | <i>hrp2</i> - |
|             | AMPL3592823                       | >1.40                                | & <i>hrp3</i> - | <i>hrp2</i> + |
|             | AMPL3593063                       | < -0.3                               | <i>hrp2</i> -   |               |
|             | AMPL3593063                       | < 0.2                                | & <i>hrp3</i> + | <i>hrp2</i> - |
|             | AMPL3593063                       | >1.2                                 | & <i>hrp3</i> - | <i>hrp2</i> + |
|             | AMPL3593061                       | < -0.15                              | & <i>hrp3</i> - | <i>hrp2</i> - |
|             | AMPL3593061                       | >= -0.15                             | & <i>hrp3</i> - | <i>hrp2</i> + |
|             | AMPL3593061                       | < -0.8                               | & <i>hrp3</i> + | <i>hrp2</i> - |
| AMPL3593062 | Not used; no discriminatory power |                                      |                 |               |

## Supplementary methods

### 1. SNP Barcode selection

Online whole genome data from the MalariaGEN *Plasmodium falciparum* Community Project (Catalogue of genetic variation v4.0 (2015) (1) and 2016 data release (2)) were used for population genetic analyses, resulting in a final selection of 28 SNP for a genetic barcode for *P. falciparum* parasites in South America, and Peru in particular. These SNPs were common within the Peruvian *P. falciparum* samples in the WGS dataset (*i.e.* showed a high minor allele frequency (>0.35)) and differentiated these samples from other populations in the dataset (using discriminant analysis of principle components). Moreover, they were broadly distributed across the *P. falciparum* genome and were not under selective pressure from parasite environmental factors, like drug exposure or host immunity.

As a first selection, the MalariaGEN *Plasmodium falciparum* Community Project Catalogue of genetic variation v4.0 (2015) was used with the online data app (900.000+ high quality SNPs) to select SNPs with minor allele frequency (MAF) in South America ranging between 0.35-0.5, resulting in 1880 selected SNPs. Subsequently, these 1880 loci in the MalariaGEN *Plasmodium falciparum* Community Project 2016 data release (2), were investigated for heterozygous genotypes at these loci in all 3394 samples. Loci that were heterozygous in one or more of the 7 Peruvian samples in the database were removed, resulting in a selection of 1778 SNPs. With all samples (from all countries) that had homozygous genotype calls at these loci (N=338) we proceeded with examining country level population structure using discriminant analysis of principal components (DAPC with the adegenet package in R (3)). On a per chromosome basis, the contribution of each SNP to the first component of the DAPC (*i.e.* allele loadings) were scored and sorted. DAPC was performed using countries as populations for all countries (150 principal components retained and 5 discriminants), as well as a subset analysis with South American countries only (Peru and Colombia; 5 principal components retained and 1 discriminant). For the top contributing alleles (Supplementary data 3), pairwise linkage disequilibrium (LD) between selected SNPs was calculated using the R package poppr in R and a selection of 4-13 SNPs/chromosome was made with the lowest LD. Next pairwise LD was examined between the selected SNPs at all chromosomes, and any known antigens or genes that could potentially be under selection (*e.g.* exposed on outer membrane) were removed from the list. Finally, 2 SNPs per chromosome were selected, with priority given for synonymous SNPs with low pairwise LD, resulting in a barcode of 28 SNPs (Table S17).

**Table S17. Selected SNP positions and annotated gene location in the final barcode. *Syn* = synonymous mutation, *Non-syn* = non-synonymous mutation.**

| SNP ID           | chr | position | gene                                                    | type    |
|------------------|-----|----------|---------------------------------------------------------|---------|
| Pf3D7_01_205066  | 1   | 205066   | "conserved Plasmodium protein, unknown function"        | Syn     |
| Pf3D7_01_339436  | 1   | 339436   | "conserved Plasmodium protein, unknown function"        | Non-syn |
| Pf3D7_02_694307  | 2   | 694307   | "conserved Plasmodium protein, unknown function"        | Syn     |
| Pf3D7_02_519457  | 2   | 519457   | conserved Plasmodium protein, unknown function"         | Syn     |
| Pf3D7_03_361199  | 3   | 361199   | "conserved Plasmodium protein, unknown function"        | Syn     |
| Pf3D7_03_849476  | 3   | 849476   | oocyst capsule protein (Cap380)                         | Non-syn |
| Pf3D7_04_691961  | 4   | 691961   | "conserved Plasmodium protein, unknown function"        | Non-syn |
| Pf3D7_04_770292  | 4   | 770292   | "conserved Plasmodium protein, unknown function"        | Non-syn |
| Pf3D7_05_1188394 | 5   | 1188394  | "conserved Plasmodium protein, unknown function"        | Non-syn |
| Pf3D7_05_921893  | 5   | 921893   | "conserved Plasmodium protein, unknown function"        | Non-syn |
| Pf3D7_06_148827  | 6   | 148827   | AT-rich interactive domain-containing protein, putative | Syn     |
| Pf3D7_06_636044  | 6   | 636044   | "ribonuclease, putative"                                | Non-syn |
| Pf3D7_07_455494  | 7   | 455494   | conserved Plasmodium protein, unknown function"         | Syn     |
| Pf3D7_07_782111  | 7   | 782111   | "dynein heavy chain, putative"                          | Non-syn |
| Pf3D7_08_501042  | 8   | 501042   | "RuvB DNA helicase, putative"                           | Syn     |
| Pf3D7_08_803172  | 8   | 803172   | "conserved Plasmodium protein, unknown function"        | Non-syn |
| Pf3D7_09_1005351 | 9   | 1005351  | "conserved Plasmodium protein, unknown function"        | Non-syn |
| Pf3D7_09_231065  | 9   | 231065   | "Cu <sup>2+</sup> -transporting ATPase, putative (CUP)" | Non-syn |
| Pf3D7_10_341106  | 10  | 341106   | "conserved Plasmodium protein, unknown function"        | Syn     |
| Pf3D7_10_1172712 | 10  | 1172712  | partial CSTF domain-containing protein, putative        | non-syn |
| Pf3D7_11_874948  | 11  | 874948   | calcium dependent protein kinase 6+(CDPK6)              | non-syn |
| Pf3D7_11_1505533 | 11  | 1505533  | guanylyl cyclase (GCalpha)                              | non-syn |
| Pf3D7_12_1127001 | 12  | 1127001  | "cyclin related protein, putative"                      | non-syn |
| Pf3D7_12_1552084 | 12  | 1552084  | "conserved Plasmodium protein, unknown function"        | Syn     |
| Pf3D7_13_1595988 | 13  | 1595988  | "conserved Plasmodium protein, unknown function"        | Syn     |
| Pf3D7_13_1827569 | 13  | 1827569  | inner membrane complex protein                          | non-syn |
| Pf3D7_14_832594  | 14  | 832594   | "conserved Plasmodium protein, unknown function"        | non-syn |
| Pf3D7_14_1381943 | 14  | 1381943  | "conserved Plasmodium protein, unknown function"        | non-syn |

## 2. Bioinformatic analysis for validation

Reads from the demultiplexed FASTQ files were trimmed using Trimmomatic (settings: ILLUMINACLIP: 2:30:10 LEADING:3 TRAILING:3 SLIDINGWINDOW:4:15 MINLEN:36) to remove adapter sequences and poor-quality reads. Trimmed reads were aligned to the 3D7 reference genome (version plasmoDB-44) using Burrows-Wheeler aligner (v0.7.17) (5). Alignment statistics were generated using Picard's CollectAlignmentSummaryMetrics. Variants in amplicons including overlapping regions were called using HaplotypeCaller (GATK, v4.1.2) (6) and individual sample and control gVCF files were combined to jointly call genotypes using GenotypeGVCFs. Variants were hard filtered (QUAL>30, overall DP>100, MQ>50, QD>1.0, ReadPosRankSum >-10, SOR<4, GT depth >5) and annotated with SnpEff (v4.3T) (7), resulting in 2,146 high quality genotypes. Per locus filtered depth of coverage (format field DP) was used to calculate median depth of all loci per sample or per amplicon. Aligned coverage was calculated as the number of bases passed filter divided by the number of bases (57445bp) targeted in the Pf AmpliSeq assay. FastQ Screen was used to determine sources of contamination in uninfected controls (8).

The 3D7 control with highest mean depth (161), 0.1% missing loci and lowest amount (4/847) of non-reference SNPs was defined as the reference sample to calculate allelic difference among 3D7 replicates (n=10) and 3D7 replicates with prior sWGA (n=5) using the R package poppr v2.8.6. (9). Error rates were determined as the number of allelic differences with the reference sample over the target region (57445 bases). Error rates were determined separately biallelic SNPs and indels, as "errors" in indels are often alignment errors rather than sequencing errors.

MS alleles were called using a different approach. The raw fastq files were aligned to reference sequences containing only the four MS amplicon regions (*poly-alpha*, *TA81*, *ARAI1* and *PfPK2*) using Burrows-Wheeler aligner (v0.7.17) (5). Subsequently, reads were realigned on repeats using Genotan v0.1.5 (10) and short tandem repeat (STR) length was determined using HipSTR (11). As HipSTR is made for diploid genomes, only the 2 predominant MS genotypes present in the sequencing reads are called. While this does not allow us to give exact estimates of COI, we can distinguish between single clone (COI =1) vs. multiple clone infections (COI≥2, if 2 MS alleles are found for ≥1 MS locus).

The presence or absence of the *hrp2* and *hrp3* genes was determined for each sample using the mean read depth of respective amplicons compared to the mean depth of all amplicons, resulting in a depth ratio. Log transformed mean depth ratios of previously typed samples were used to define thresholds for classification for each amplicon (Figure S9 and table S16). A final classification of presence/absence of *hrp2* and *hrp3* was based on the proportion of amplicons with a deletion. Due to the repetitive nature and homologies of the *hrp2* and *hrp3* genes, misalignment between reads of *hrp3* with *hrp2* occurred, therefore we used a conservative cut-off value, which sometimes resulted in a "grey zone" where deletion/presence was left inconclusive when the majority of amplicons were not in accordance. One amplicon for *hrp2* (AMPL3593062) was not used for the classification, as it offered no discriminatory power. A final variable for RDT failure (classified as both *hrp2* and *hrp3* absent) vs. RDT detectable (*hrp2* and/or *hrp3* was present) was created, allowing also the classification of samples that were inconclusive in one of the two genes in case the other gene was present.

Allele frequencies (AF) at barcode loci were calculated from allele depths to reflect true population allele frequencies in complex infections using an in-house R script. First, AF was calculated per locus

and sample using the allele depths. Next, we summed the AF at each locus (SUM-AF) from all samples and then divided the SUM-AFs by the sum of within-sample AFs for all alleles at that locus.

A neighbor-joining tree was made a matrix of Euclidean distances using core variants of all selected samples and controls using the R-packages stats and ape (13, 14). The tree was rooted on the 3D7 reference isolate and visualized in Microreact (15).

### References supplementary methods

1. MalariaGEN. MalariaGEN Plasmodium falciparum Community Project: MRC Centre for Genomics and Global Health; 2015 [Available from: <https://www.malariagen.net/apps/pf/4.0/>].
2. Malaria GENPFCP. Genomic epidemiology of artemisinin resistant malaria. *Elife*. 2016;5.
3. Jombart T, Devillard S, Balloux F. Discriminant analysis of principal components: a new method for the analysis of genetically structured populations. *BMC Genet*. 2010;11:94.
4. Andrews S. FastQC: a quality control tool for high throughput sequence data. 2010.
5. Li H, Durbin R. Fast and accurate short read alignment with Burrows-Wheeler transform. *Bioinformatics*. 2009;25(14):1754-60.
6. Genome Analysis Toolkit (GATK). 4.0.12.0 ed: Broad Institute; 2018.
7. Cingolani P, Platts A, Wang le L, Coon M, Nguyen T, Wang L, et al. A program for annotating and predicting the effects of single nucleotide polymorphisms, SnpEff: SNPs in the genome of *Drosophila melanogaster* strain w1118; iso-2; iso-3. *Fly (Austin)*. 2012;6(2):80-92.
8. Wingett S, Andrews S. FastQ Screen: A tool for multi-genome mapping and quality control [version 2; peer review: 4 approved]. *F1000Research*. 2018;7(1338).
9. Kamvar ZN, Tabima JF, Grunwald NJ. Poppr: an R package for genetic analysis of populations with clonal, partially clonal, and/or sexual reproduction. *PeerJ*. 2014;2:e281.
10. Tae H, Kim Dy Fau - McCormick J, McCormick J Fau - Settlage RE, Settlage Re Fau - Garner HR, Garner HR. Discretized Gaussian mixture for genotyping of microsatellite loci containing homopolymer runs. (1367-4811 (Electronic)).
11. Willems T, Zielinski D, Yuan J, Gordon A, Gymrek M, Erlich Y. Genome-wide profiling of heritable and de novo STR variations. *Nature Methods*. 2017;14(6):590-2.
12. Gamboa D, Ho MF, Bendezu J, Torres K, Chiodini PL, Barnwell JW, et al. A large proportion of *P. falciparum* isolates in the Amazon region of Peru lack pfhrp2 and pfhrp3: implications for malaria rapid diagnostic tests. *PloS one*. 2010;5(1):e8091.
13. Paradis E, Claude J, Strimmer K. APE: Analyses of Phylogenetics and Evolution in R language. *Bioinformatics*. 2004;20(2):289-90.
14. Paradis E, Schliep K. ape 5.0: an environment for modern phylogenetics and evolutionary analyses in R. *Bioinformatics*. 2019;35(3):526-8.
15. Argimón S, Abudahab K, Goater RJE, Fedosejev A, Bhai J, Glasner C, et al. Microreact: visualizing and sharing data for genomic epidemiology and phylogeography. *Microbial Genomics*. 2016;2(11).
